# Supplementary material
Source: PubMed Central journal article supplement (PMC5658033)
Supplement: NIHMS894344-supplement-Supp_TableS1-2.pdf [file NIHMS894344-supplement-Supp_TableS1-2.pdf]

Supplemental Table 1. Impact of cancer-related program activity, effects, and content on screening outcomes in the past year, adjusted for demographics and systems events

| Outcomes without Mediators                | Colorectal Screening (N=3642) |               |       | Mammograms (N=2650) |               |       | Cervical Screening (N=4593) |               |       | Tobacco Quit Attempts (N=1402) |               |       |
|-------------------------------------------|-------------------------------|---------------|-------|---------------------|---------------|-------|-----------------------------|---------------|-------|--------------------------------|---------------|-------|
|                                           | OR                            | 95% CI for OR |       | OR                  | 95% CI for OR |       | OR                          | 95% CI for OR |       | OR                             | 95% CI for OR |       |
|                                           |                               | Lower         | Upper |                     | Lower         | Upper |                             | Lower         | Upper |                                | Lower         | Upper |
| <b>Indicators of Program Activity</b>     |                               |               |       |                     |               |       |                             |               |       |                                |               |       |
| Cumulative Local Programs                 |                               |               |       |                     |               |       |                             |               |       |                                |               |       |
| Cumulative Attendance                     |                               |               |       |                     |               |       | <b>0.91</b>                 | 0.87          | 0.97  | <b>1.15</b>                    | 1.03          | 1.28  |
| Cumulative Outside Programs               |                               |               |       |                     |               |       |                             |               |       |                                |               |       |
| Time since most Recent Program            |                               |               |       |                     |               |       |                             |               |       |                                |               |       |
| Likelihood of Awareness                   |                               |               |       |                     |               |       |                             |               |       |                                |               |       |
| <b>Sub-Group-Specific Program Effects</b> |                               |               |       |                     |               |       |                             |               |       |                                |               |       |
| Local Programs x Latino                   | <b>1.03</b>                   | 1.00          | 1.06  |                     |               |       |                             |               |       | <b>1.12</b>                    | 1.05          | 1.20  |
| Local Programs x Asian                    |                               |               |       | 1.03                | 1.00          | 1.07  |                             |               |       |                                |               |       |
| Most Recent x Born in US                  |                               |               |       |                     |               |       |                             |               |       |                                |               |       |
| Most Recent x Latino                      |                               |               |       |                     |               |       |                             |               |       |                                |               |       |
| Most Recent x Asian                       |                               |               |       |                     |               |       |                             |               |       | <b>1.42</b>                    | 1.03          | 1.96  |
| <b>Program Content Areas</b>              |                               |               |       |                     |               |       |                             |               |       |                                |               |       |
| Breast/Cervical CA                        |                               |               |       |                     |               |       | <b>1.05</b>                 | 1.01          | 1.10  |                                |               |       |
| Sexual Risk x White                       |                               |               |       |                     |               |       |                             |               |       |                                |               |       |
| Cervical CA x White                       |                               |               |       |                     |               |       |                             |               |       |                                |               |       |
| Tobacco Risk x Latino                     |                               |               |       |                     |               |       |                             |               |       | <b>0.38</b>                    | 0.17          | 0.85  |
| <b>Demographics</b>                       |                               |               |       |                     |               |       |                             |               |       |                                |               |       |
| Age                                       | <b>1.51</b>                   | 1.40          | 1.63  | <b>1.19</b>         | 1.11          | 1.28  | <b>0.94</b>                 | 0.90          | 0.97  | <b>0.90</b>                    | 0.84          | 0.97  |
| Gender                                    |                               |               |       |                     |               |       |                             |               |       |                                |               |       |
| Asian                                     | <b>0.66</b>                   | 0.54          | 0.81  | <b>0.54</b>         | 0.41          | 0.71  | <b>0.40</b>                 | 0.34          | 0.48  |                                |               |       |
| U.S. Black                                |                               |               |       |                     |               |       |                             |               |       |                                |               |       |
| White                                     |                               |               |       | <b>0.66</b>         | 0.55          | 0.81  | <b>0.61</b>                 | 0.52          | 0.71  |                                |               |       |
| Latino                                    |                               |               |       |                     |               |       |                             |               |       |                                |               |       |
| African                                   |                               |               |       |                     |               |       |                             |               |       | <b>5.62</b>                    | 1.60          | 19.74 |
| Born in US                                |                               |               |       |                     |               |       |                             |               |       | <b>1.62</b>                    | 1.22          | 2.15  |
| HS Grad                                   | <b>1.22</b>                   | 1.03          | 1.45  |                     |               |       |                             |               |       |                                |               |       |
| College Grad                              |                               |               |       |                     |               |       | <b>1.19</b>                 | 1.04          | 1.37  | <b>0.62</b>                    | 0.47          | 0.81  |
| <b>Systems Events</b>                     |                               |               |       |                     |               |       |                             |               |       |                                |               |       |
| Hospital Closures                         |                               |               |       | <b>0.82</b>         | 0.70          | 0.97  |                             |               |       |                                |               |       |

OR=Odds Ratio; **Bolded** values are statistically significant with a Type I error rate of 0.05.

**Supplemental Table 2. Impact of cancer-related program activity, effects, and content on screening outcomes in the past year, adjusted for mediators and demographics**

| Outcomes with Mediators               | Colorectal Screening (N=750) |               |       | Mammograms (N=1213) |               |       | Cervical Screening (N=4461) |               |       | Tobacco Quit Attempts (N=459) |               |        |
|---------------------------------------|------------------------------|---------------|-------|---------------------|---------------|-------|-----------------------------|---------------|-------|-------------------------------|---------------|--------|
|                                       | OR                           | 95% CI for OR |       | OR                  | 95% CI for OR |       | OR                          | 95% CI for OR |       | OR                            | 95% CI for OR |        |
|                                       |                              | Lower         | Upper |                     | Lower         | Upper |                             | Lower         | Upper |                               | Lower         | Upper  |
| <b>Indicators of Program Activity</b> |                              |               |       |                     |               |       |                             |               |       |                               |               |        |
| Cumulative Local Programs             |                              |               |       |                     |               |       |                             |               |       |                               |               |        |
| Cumulative Attendance                 |                              |               |       |                     |               |       |                             |               |       |                               |               |        |
| Cumulative Outside Programs           |                              |               |       |                     |               |       |                             |               |       |                               |               |        |
| Time since most Recent Program        |                              |               |       |                     |               |       |                             |               |       |                               |               |        |
| Likelihood of Awareness               |                              |               |       |                     |               |       |                             |               |       |                               |               |        |
| <b>Group-Specific Program Effects</b> |                              |               |       |                     |               |       |                             |               |       |                               |               |        |
| Attendance x Born in US               | <b>1.24</b>                  | 1.03          | 1.49  |                     |               |       |                             |               |       |                               |               |        |
| Awareness x Born in US                |                              |               |       | 0.95                | 0.90          | 1.00  |                             |               |       |                               |               |        |
| Other x Latina                        |                              |               |       | 1.13                | 1.04          | 1.23  | <b>0.99</b>                 | 0.99          | 1.00  |                               |               |        |
| Local Programs x Latino               |                              |               |       |                     |               |       |                             |               |       | 1.09                          | 0.96          | 1.25   |
| Attendance x Latino                   |                              |               |       |                     |               |       |                             |               |       | <b>1.82</b>                   | 1.11          | 2.96   |
| Most Recent x Born in US              |                              |               |       |                     |               |       |                             |               |       | <b>1.87</b>                   | 1.22          | 2.85   |
| Most Recent x Latino                  |                              |               |       |                     |               |       |                             |               |       | 0.76                          | 0.54          | 1.07   |
| <b>Program Content Areas</b>          |                              |               |       |                     |               |       |                             |               |       |                               |               |        |
| Sexual Risk                           |                              |               |       |                     |               |       | 1.25                        | 0.69          | 2.27  |                               |               |        |
| Sexual Risk x H.S. Grad               |                              |               |       |                     |               |       | <b>0.41</b>                 | 0.20          | 0.83  |                               |               |        |
| Tobacco Risk x White                  |                              |               |       |                     |               |       |                             |               |       | 2.07                          | 0.93          | 4.65   |
| Tobacco Risk x Latino                 |                              |               |       |                     |               |       |                             |               |       | <b>0.13</b>                   | 0.03          | 0.65   |
| <b>Demographics</b>                   |                              |               |       |                     |               |       |                             |               |       |                               |               |        |
| Age                                   | <b>1.37</b>                  | 1.13          | 1.66  | <b>1.39</b>         | 1.15          | 1.69  |                             |               |       | <b>0.84</b>                   | 0.73          | 0.97   |
| Gender                                |                              |               |       |                     |               |       |                             |               |       |                               |               |        |
| Asian                                 | <b>0.61</b>                  | 0.40          | 0.93  |                     |               |       | <b>0.47</b>                 | 0.32          | 0.68  | <b>3.66</b>                   | 1.81          | 7.38   |
| U.S. Black                            |                              |               |       |                     |               |       |                             |               |       |                               |               |        |
| White                                 |                              |               |       | <b>0.34</b>         | 0.19          | 0.62  | <b>0.70</b>                 | 0.50          | 1.00  |                               |               |        |
| Latino                                |                              |               |       | <b>1.75</b>         | 1.20          | 2.56  | <b>2.08</b>                 | 1.37          | 3.15  |                               |               |        |
| African                               |                              |               |       |                     |               |       |                             |               |       | <b>12.99</b>                  | 1.42          | 119.04 |
| Born in US                            |                              |               |       |                     |               |       | <b>0.68</b>                 | 0.51          | 0.92  |                               |               |        |
| High School Grad                      |                              |               |       |                     |               |       |                             |               |       |                               |               |        |
| College Grad                          |                              |               |       |                     |               |       |                             |               |       | <b>0.40</b>                   | 0.24          | 0.68   |
| <b>System Events</b>                  |                              |               |       |                     |               |       |                             |               |       |                               |               |        |
| Hospital Closures                     |                              |               |       | 0.73                | 0.51          | 1.06  | <b>0.98</b>                 | 0.74          | 1.30  |                               |               |        |

OR=Odds Ratio; **Bolded** values are statistically significant with a Type I error rate of 0.05.
